# SCAR and the Arp2/3 complex polarise the actomyosin cortex and plasma membrane organization in asymmetrically dividing neuroblasts

1 Giulia Cazzagon<sup>1</sup>, Chantal Roubinet<sup>1\*\*</sup>, Buzz Baum<sup>1\*</sup>

2  
3 <sup>1</sup>Medical Research Council Laboratory of Molecular Biology, Cambridge, CB2 0QH,  
4 United Kingdom.

5 \* Corresponding author ([bbaum@mrc-lmb.cam.ac.uk](mailto:bbaum@mrc-lmb.cam.ac.uk))

6 \*\* Co-corresponding author ([croubinet@mrc-lmb.cam.ac.uk](mailto:croubinet@mrc-lmb.cam.ac.uk))

7

## 8 **Abstract**

9 While the Formin-nucleated actomyosin cortex has been shown to drive the  
10 changes in cell shape that accompany cell division in both symmetric and asymmetric  
11 cell divisions, it is not clear whether or not Arp2/3-nucleated branched actin filament  
12 networks also play a role. In order to look for mitotic roles of the Arp2/3 complex, here  
13 we use *Drosophila* neural stem cells as a model system. These cells are unusual in  
14 that they divide asymmetrically to produce a large and small daughter cell with different  
15 fates. Our analysis identifies a pool of Arp2/3-dependent actin-based membrane  
16 protrusions that form at the apical cortex of these cells as they enter mitosis. Strikingly,  
17 at metaphase, these protrusions co-localise with components of the SCAR complex.  
18 By perturbing Arp2/3 complex activity we show that this apical pool of actin likely  
19 functions to limit the accumulation of apical Myosin in metaphase. Following the onset  
20 of anaphase, the loss of these SCAR and Arp2/3 dependent structures then leads to  
21 a delay in the clearance of apical Myosin and to cortical instability at cytokinesis. These  
22 data point to a role for a polarised branched actin filament network in fine tuning the  
23 apical actomyosin cortex to enable the precise control of cell shape during asymmetric  
24 cell division.

25

26

## 27 Introduction

28 While the Formin-nucleated actomyosin cortex is known to control the changes in  
29 cell shape that accompany division, much remains to be discovered about the role of  
30 branched actin networks during this process. The Arp2/3 complex is a nucleator of  
31 actin branched filaments, best known for its role in the formation of lamellipodial  
32 protrusions during adherent cell spreading and migration, in intracellular motility of  
33 pathogens, and in the fission of membranes during trafficking (Derivery et al., 2009;  
34 Kunda et al., 2003; Pollard, 2007; Rotty et al., 2013; Stevens et al., 2006).

35 It has been previously suggested that the Arp2/3 complex is mostly active in  
36 interphase, playing limited roles during mitotic entry and mitotic exit (Ramkumar &  
37 Baum, 2016). As examples of this, Arp2/3 dependent actin filaments have been shown  
38 to form at the centrosomes in cells entering and exiting mitosis and at the interface  
39 between newly divided cells (Farina et al., 2019; Herszterg et al., 2013; Plessner et  
40 al., 2019; Rajan et al., 2009; Trylinski & Schweisguth, 2019). This may be important  
41 since, when hyperactivated in patient cells, Arp2/3 dependent actin filament formation  
42 can impair chromosome segregation (Moulding et al., 2012).

43 However, a growing body of work carried out using mammalian cells in culture has  
44 also suggested that the Arp2/3 complex can generate actin filaments during mitosis.  
45 Indeed, in HeLa cells the Arp2/3 complex was shown to induce the formation of a  
46 rotating wave of actin filaments (Fink et al., 2011; Mitsushima et al., 2010) – although  
47 the role of this actin remains far from clear. In addition, the Arp2/3 complex has been  
48 implicated in the stabilisation of the mitotic cell cortex (Bovellan et al., 2014; Cao et  
49 al., 2020). However, it remains unclear whether or not the Arp2/3 complex plays a  
50 general function in mitosis. In addition, it remains to be tested whether or not Arp2/3  
51 dependent actin filament formation plays important roles in the context of asymmetric  
52 cell division.

53 In general, the mechanisms that lead to shape changes in dividing *Drosophila* cells  
54 are very similar to those operating in vertebrate cells. In brief, upon entry into mitosis,  
55 the activation of Ect2 triggers Formin-dependent actin filament formation along with  
56 non-muscle Myosin II activation (hereafter called Myosin) to generate a contractile  
57 mitotic actomyosin cortex, which drives mitotic rounding (D'Avino et al., 2015;  
58 Matthews et al., 2012; Ramkumar & Baum, 2016; Rosa et al., 2015). Then at mitotic

59 exit, cues from the spindle midzone and, more controversially, the anaphase  
60 chromatin polarise the mitotic cell cortex to allow the formation of a contractile  
61 actomyosin ring and division (D'Avino et al., 2015; Kiyomitsu & Cheeseman, 2012;  
62 Ramkumar & Baum, 2016; Rodrigues et al., 2015). However, there is currently little  
63 evidence for a role for the Arp2/3 complex in this type of cortical remodelling (Trylinski  
64 & Schweisguth, 2019).

65 Cells undergoing asymmetric divisions, like *Drosophila* neuroblasts, are likely to  
66 face additional challenges as they divide. At each round of asymmetric division, these  
67 neuronal stem cells produce two daughter cells with different size and fate: a big cell  
68 which retains stem cell feature, and a small cell, called ganglion mother cell (GMC),  
69 which divides again and differentiate into neurons or glial cells (Bello et al., 2008;  
70 Boone & Doe, 2008). In this system, polar cortical cues along with a polarised spindle  
71 function to break the symmetry of the mitotic cortex. As a result, at the onset of  
72 anaphase, Myosin is cleared from the apical cell cortex before being cleared from the  
73 basal cortex. This leads to biased cortical expansion, and to polarised cortical Myosin  
74 flows that drive the asymmetric positioning of the division ring and asymmetric division  
75 generating unequal sized sibling cells (Cabernard et al., 2010; Connell et al., 2011;  
76 Roubinet et al., 2017).

77 These actomyosin flows are coupled to membrane flows (Hannaford et al., 2018;  
78 LaFoya & Prehoda, 2021; Oon & Prehoda, 2019, 2021). In neuroblasts, membrane  
79 flows were recently shown to become polarized in early stages of mitosis, when they  
80 move apically. They are then reversed at the onset of anaphase, leading to the  
81 dispersal of the membrane domains across the cell surface (LaFoya & Prehoda,  
82 2021). Interestingly, these movements have been shown to depend on cortical polarity  
83 and on the actomyosin cortex, implying a link between the membrane and the  
84 underlying cortex that could be important for asymmetric division (Hannaford et al.,  
85 2018; LaFoya & Prehoda, 2021; Oon & Prehoda, 2019, 2021).

86 In this paper we study the roles of the Arp2/3 complex and its upstream nucleation  
87 promoting actors in the regulation of membrane and cortical flows, mitotic cell shape,  
88 and division in fly neuroblasts. Using a combination of genetics and live cell imaging,  
89 our analysis reveals the existence of a pool of polarized actin-based membrane  
90 protrusions at the apical side of mitotic neuroblasts, which co-localise with SCAR  
91 complex components, whose organization depends on the Arp2/3 complex. We also  
92 show that this local remodelling of the actin cortex limits apical Myosin accumulation

93 in metaphase, and when perturbed leads to cortical defects and membrane instability  
94 at cytokinesis. In this way, a local Arp2/3-dependent branched actin network appears  
95 to polarise the actomyosin cortex in mitotic neuroblasts to help guide the precisely  
96 choreographed cortical remodelling necessary for asymmetric cell division.

97

## 98 Results

99 To study changes in membrane organization during passage through mitosis we  
100 began by using the Plekstrin Homology (PH) domain from the phospholipase  $\text{CD1}$   
101 (PLC $\Delta$ 1) that interacts with the headgroup of the phosphatidylinositol 4,5-  
102 bisphosphate (PIP $_2$ ) as a probe. This marker was chosen because it labels the plasma  
103 membrane and membrane protrusions, but not internal membranes (Figure 1A), and  
104 revealed changes in apical membrane organisation with mitotic progression (Figure  
105 1A). To understand if these changes were local or global in nature, we compared PH  
106 intensity at the apical domain and the lateral membrane of mitotic cells. This analysis  
107 revealed that PH signal at the apical domain increases from prophase to metaphase,  
108 and then rapidly decreases upon the onset of anaphase, while the intensity of the  
109 signal in the lateral membrane remains constant (Figure 1B, and Supplemental Figure  
110 S1A-B). In these cells, an analysis of bright PH-labelled membrane domains also  
111 revealed a change in the polarity of membrane flows that depends on cell cycle stages,  
112 as previously reported (Supplemental Figure S1C) (LaFoya & Prehoda, 2021; Oon &  
113 Prehoda, 2019).

114 To better understand these membrane dynamics, we used super-resolution  
115 spinning-disk confocal microscopy to image neuroblast metaphase-anaphase  
116 transition at higher temporal (20 sec/frame) and spatial resolution. In these movies,  
117 when the apical surface of cells was not in contact with overlying tissue, filopodia-like  
118 membrane structures could be seen forming at the apical cell surface at metaphase  
119 (Figure 1C, Apical insert, -1:00 to 0:40 min), while the basal cortex appeared relatively  
120 unchanged over this period (Figure 1C, Basal inserts). These apical protrusions were  
121 0.7-1  $\mu\text{m}$  in length, started to disappear 1 minute after anaphase onset, and were  
122 completely gone by the end of telophase (Figure 1C, Apical insert, 2:20 min); implying  
123 that they are absorbed as the apical cortex expands. The presence of polarized  
124 protrusions was confirmed using another membrane marker, GAP43 (Supplemental  
125 Figure S1D), demonstrating that they are a characteristic feature of the apical  
126 membrane independently of the reporter used. Sometime later, the membrane marker  
127 also revealed a population of protrusions forming between the two daughter cells at  
128 the site of cleavage (Figure 1A and 1D, arrowhead), similar to those described

129 previously at new cell interfaces in other cell types (Herszberg et al., 2013; Rajan et  
 130 al., 2009; Trylinski et al., 2017).

131

132

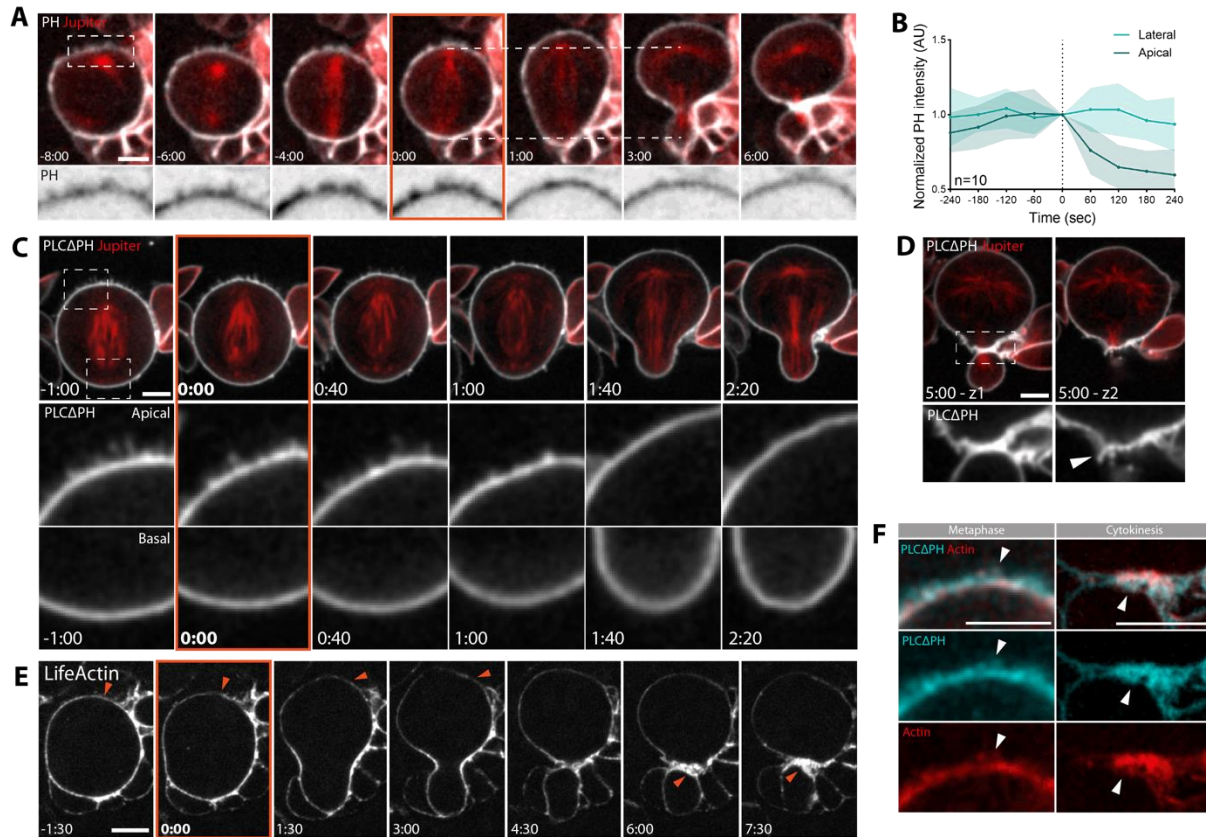

133

134 **Figure 1. Dividing neuroblasts exhibit polarized membrane protrusions at metaphase, that**  
 135 **disappear with cortical expansion following anaphase onset. A.** Representative dividing neuroblast  
 136 expressing membrane marker PLCΔPH::GFP and microtubule marker cherry::Jupiter, both expressed  
 137 via wor-GAL4/UAS. Dotted lines highlight cortical expansion of the apical neuroblast domain, compared  
 138 to the basal side that does not expand. **B.** Plot that shows PH intensity changes during mitosis  
 139 progression in apical and lateral membrane. Data are included in Figure 1 – source data 1. **C.** Super-  
 140 resolution imaging of neuroblast expressing PH::GFP and microtubule marker cherry::Jupiter. Inserts  
 141 are apical and basal, respectively. **D.** Z-sections of cell at cytokinesis. Arrowhead points to membrane  
 142 protrusion at the furrow. **E.** Dividing neuroblast expressing actin reporter UAS-LifeAct::GFP.  
 143 Arrowheads point to actin being cleared from the apical cortex during metaphase-anaphase transition  
 144 (-1:30 to 3:00 min), and to accumulation of actin at the cytokinetic furrow (6:00-7:00 min). **F.** Super-  
 145 resolution live imaging of cells in metaphase or cytokinesis expressing PH::mCherry and LifeAct::GFP,  
 146 both driven by wor-GAL4/UAS system. Arrowheads point to membrane protrusions that appear to be  
 147 positive for actin filaments. Scale bar: 5 μm. Central and error bars: mean and SD.

148

149

150

151

152 Since membrane protrusions are often actin-based, we used the LifeAct::GFP  
153 probe to image the localisation of actin filaments in mitotic neuroblasts. This revealed  
154 an accumulation of actin at the apical cortex, which was cleared during the metaphase-  
155 anaphase transition (Figure 1E, arrowheads from -1:30 to 3:00 min). Once again,  
156 actin-rich protrusions were also observed later at the furrow following cytokinesis  
157 (Figure 1E, arrowheads 6:00-7:30 min). Both sets of actin structures were found to  
158 colocalise with the PH signal in flies carrying both markers (Figure 1F, arrowheads).

159 Since actin and membrane protrusions at the cytokinetic furrow in *Drosophila*  
160 sensory organ precursors (SOPs) have previously been shown to depend on the actin  
161 nuclear-promoting factor SCAR (Georgiou & Baum, 2010; Trylinski & Schweisguth,  
162 2019), we decided to test if this was also the case in the neuroblast. To do so, we  
163 dissociated larval brains to look at isolated neuroblasts, and imaged cells expressing  
164 SCAR::GFP at high spatial resolution. This experiment revealed the asymmetric  
165 localization of SCAR at the apical side of the neuroblast in metaphase (Figure 2A,  
166 arrowheads, and Figure 2B). When the neuroblast entered anaphase, SCAR::GFP  
167 was lost from the apical cortex, before accumulating at the basal side of the cell  
168 sometime later, where it became concentrated at the cytokinetic furrow (Figure 2A,  
169 arrowhead, and Figure 2B). Since SCAR is part of a stable multiprotein complex, we  
170 validated this localization using a second complex component, Abi (Supplemental  
171 Figure S2). We then imaged SCAR and membrane protrusions in parallel in mitotic  
172 cells expressing both PH::mCherry and SCAR::GFP (Figure 2C). While the fluorescent  
173 signal was low and there were few protrusions at prophase (Figure 2C, -8:00 minutes).  
174 By metaphase (Figure 2C, -2:00 min), numerous SCAR-positive membrane rich  
175 protrusions were visible decorating the apical surface of neuroblasts (arrowheads).  
176 When this was quantified by measuring intensity on a line drawn along the apical cell  
177 surface, it was clear that the peaks of SCAR and PH exhibit partial overlap. At  
178 anaphase (Figure 2C, 1:00 minute), the PH signal appeared to smooth out, while  
179 SCAR signal was still visible in puncta on the cortex in places that lack protrusions.  
180 These data suggest a relatively tight correlation between the presence of SCAR signal  
181 and membrane protrusions in metaphase cells.

182

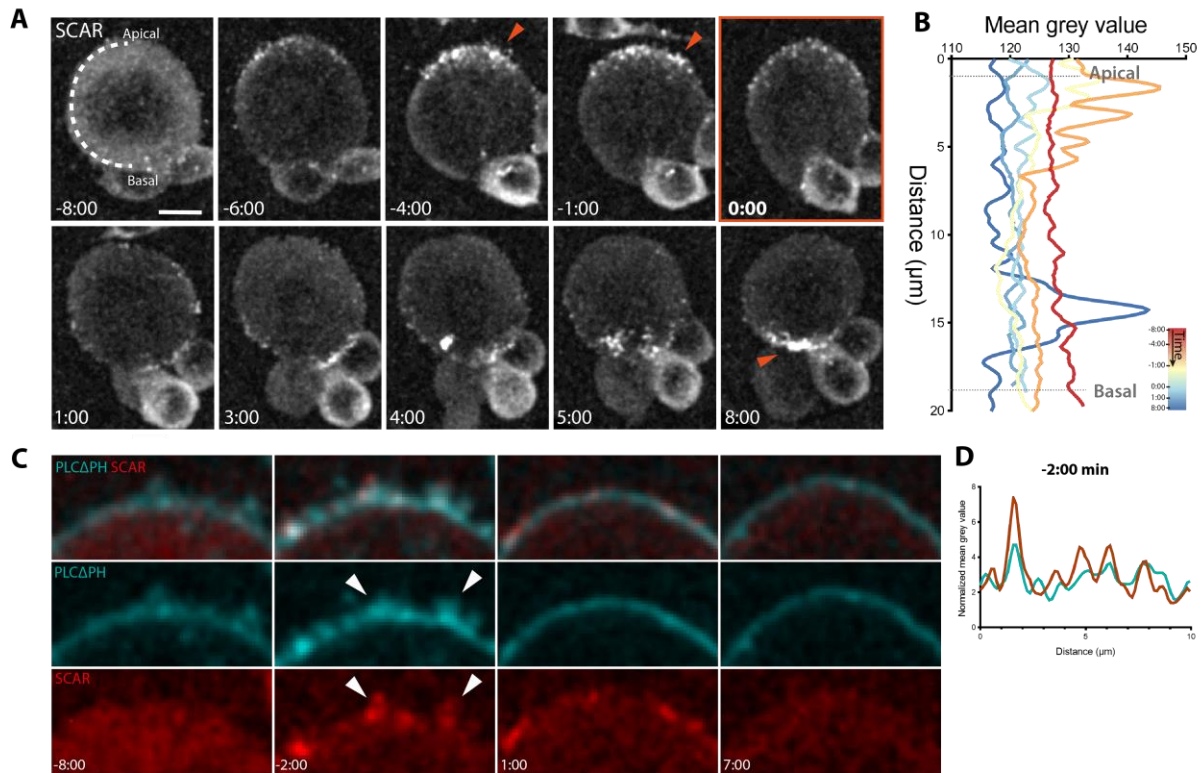

183

184 **Figure 2. SCAR co-localizes with membrane protrusions in dividing neuroblasts. A.**  
185 Representative super-resolution maximum z-projection of dissociated neuroblast expressing  
186 SCAR::GFP driven by wor-GAL4/UAS system. Arrowheads point to SCAR signal at the apical side of  
187 the neuroblast in metaphase and at the furrow in cytokinesis. **B.** Graph showing mean SCAR signal  
188 intensity, that was acquired by drawing a line from apical to basal side of the cortex, like depicted at  
189 time -8:00 in A. Individual intensities are color-coded by time. **C.** Super-resolution imaging of a  
190 representative neuroblast, showing partial co-localization of membrane protrusions (UAS-PH::mCherry)  
191 and SCAR signal (UAS-SCAR::GFP). **D.** The graph was obtained by drawing a line in the portion of  
192 cortex included in the insert at -2:00 minutes from anaphase onset and averaging PH or SCAR signals.  
193 Data were normalized by subtracting background.  
194 Scale bar: 5 μm.

195

196

197



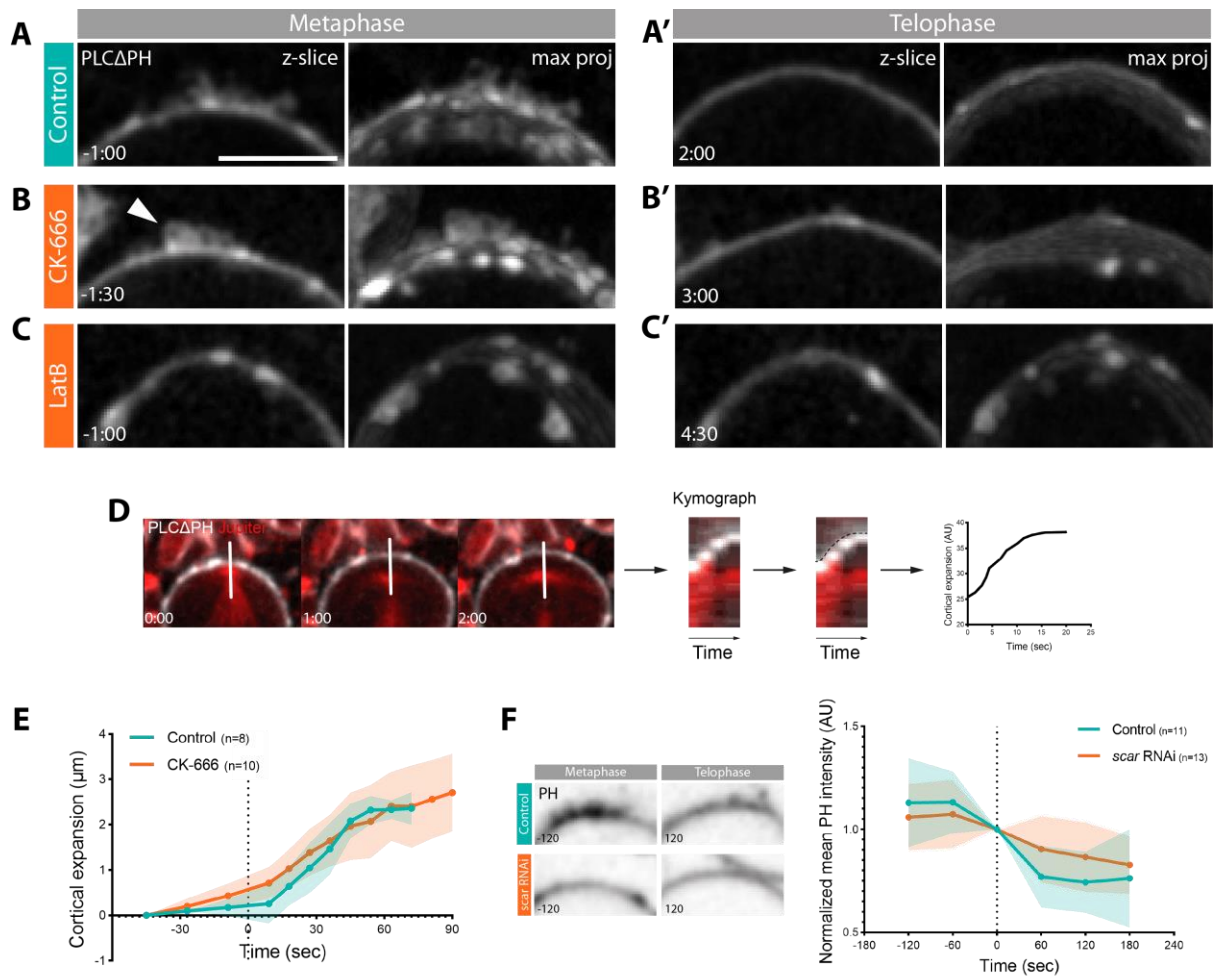

198

199

200

201

202

203

204

205

206

207

208

209

210

211

212

213

**Figure 3. The Arp2/3 complex is required for the organization of apical actin-rich protrusions and for the precise dynamics of apical expansion.** **A-C'**. Inserts depicting z-slice and maximum intensity z-projection of apical side of metaphase and telophase neuroblasts expressing PH::GFP marker. Image shows state of the cortex in control (**A-A'**) and the effect of CK-666 (**B-B'**) and Latrunculin B (**C-C'**). **D**. Schematics showing how plot in **E** was obtained: kymographs were generated drawing a line like shown in figure, the movement of the membrane was manually traced and coordinates were exported and plotted. The final result is represented by the graph on the right. **E**. Graph showing mean of membrane expansion during anaphase, for control (CK-689) and CK-666 treated cells. Coordinates were centred to start at (x=0, y=0) and to plot the mean, a linear interpolation of the x set of coordinates was performed. The slope of the two curves is significantly different (t-test, P-value=0.0044). Data are included in Figure 3 – source data 1. **F**. Images of neuroblasts apical cortex and plot showing changes in PH intensity during time in control and scar-dsRNA cells. 2-way ANOVA comparison between control and RNAi: \*P ≤ 0.05. Data are included in Figure 3 – source data 2. Scale bar: 5 μm. Central and error bars: mean and SD.

214 To test whether apical protrusion formation in this system depends on the SCAR  
215 and Arp2/3-dependent nucleation of branched actin filaments, as suggested by these  
216 data, we treated neuroblasts expressing the PH membrane marker with Arp2/3  
217 inhibitor CK-666, and then imaged the treated cells at high resolution. While CK-666  
218 treated cells possessed PH-rich membrane domains in metaphase like those seen in  
219 the control, the small molecule had a profound impact on their organisation (Figure 3A  
220 and 3B). In Arp2/3-inhibited cells, the excess membrane was observed forming small  
221 rounded structures (Figure 3B, arrowhead), rather than filopodia-like protrusions  
222 (Figure 3A). Thus, while the Arp2/3 complex activity is not required for the  
223 accumulation of membrane apically, it is required for its proper organisation. During  
224 the metaphase-anaphase transition, the membrane domains present in CK666-  
225 treated cells smoothed out so that they were no longer visible by cytokinesis (Figure  
226 3B') with similar kinetics to the loss of membrane protrusions in the control (Figure  
227 3A'). Thus, membrane flows during metaphase-anaphase transition are not abolished  
228 by inhibition of the Arp2/3 complex (Supplemental Figure S3A).

229 To determine more generally the role of actin filament in the formation of the  
230 polarized membrane protrusions in this system, we also treated cells with Latrunculin  
231 B (LatB), which binds to monomers leading to the rapid loss of actin filaments (Morton  
232 et al., 2000). Again, local patches of apical membrane were seen becoming enriched  
233 in metaphase in these drug-treated cells. However, these seemed disorganised and  
234 appeared to protrude into the cell (Figure 3C), instead of forming spike-like outward-  
235 facing protrusions like those seen in control cells (Figure 3A). These disorganised  
236 patches of membrane were still visible in later stages of mitosis (Figure 3C'), implying  
237 that LatB blocks all cortical remodelling.

238 To test if inhibiting the Arp2/3 complex also has an effect on cortical dynamics that  
239 take place during metaphase-anaphase transition, we extracted the coordinates of the  
240 movement of the membrane during the cortical expansion phase (Figure 3D). The data  
241 for individual cells was then plotted and averaged (Figure S3B and 3E). In control cells,  
242 the resulting curve depicting the dynamics of apical expansion had a clear sigmoid  
243 shape, due to a sudden movement that quickly came to a stop (Figure 3D, S3B-C). By  
244 contrast, in cells in which Arp2/3 was inhibited by CK-666, apical expansion was  
245 slower and linear (Figure 3D, S3B-C). When the slopes of the two curves were  
246 computed by fitting a sigmoid and compared, they were found to be significantly  
247 different (t-test, P-value=0.0044). Thus, although the treatment does not block apical

248 expansion, it changes the dynamics of cell shape changes following the onset of  
249 anaphase.

250 To confirm the role of SCAR in regulating membrane flows at metaphase-anaphase  
251 transition, we measured again PH intensity over the same time interval in cells where  
252 SCAR was inhibited through RNAi. While the PH probe accumulated apically before  
253 anaphase onset in control cells, and then decreased during cortical expansion (Figure  
254 3F) as expected (Figure 1B), the PH signal remained low and changed little as SCAR  
255 RNAi cells underwent cortical expansion. Indeed, there was a significant difference  
256 between the two curves (2-way ANOVA, P-value=0.0447) (Figure 3F). These data  
257 suggest that SCAR likely works together with the Arp2/3 complex in regulating  
258 organization of the apical cortex in mitotic neuroblasts.

259 The asymmetric cortical expansion observed in neuroblasts is thought to reflect a  
260 difference in the timing of apical and basal Myosin clearance at anaphase (Connell et  
261 al., 2011; Roubinet et al., 2017). Since SCAR is concentrated at the apical cell cortex,  
262 which is the first to lose Myosin at the onset of anaphase to trigger an apico-basal  
263 directed cortical flow (Supplemental Figure S4A), we decided to test if the Arp2/3  
264 complex has a role in this process. To do so, we imaged non-muscle Myosin II, using  
265 the Sqh::GFP reporter, at higher temporal (15 sec/frame) and spatial resolution (Figure  
266 4A). We then quantified Myosin levels at both the apical and basal sides of *arp3* mutant  
267 neuroblasts, and used the heterozygous as control. In heterozygous animals, cortical  
268 flow resembles that seen in the wild type (Figure 4B, and Supplemental Figure S4B),  
269 with the clearance of apical Myosin beginning around 15 seconds after anaphase  
270 onset, followed by basal clearance at around 60 seconds (Figure 4B, arrowheads). By  
271 contrast, in homozygous *arp3* mutant animals there was a significant 15 second  
272 difference in the timing of Myosin clearance from both the apical and basal cortex  
273 following the onset of anaphase. This occurred at 30 seconds for the apical cortex,  
274 and 90 seconds at the basal side (Figure 4B', arrowheads, and 4B'').

275 Furthermore, when comparing Myosin intensities at the onset of anaphase and 30  
276 seconds later, it became clear that *arp3* mutant cells accumulate higher levels of apical  
277 cortical Myosin than their control counterparts (Figure 4C-C''). This strongly suggests  
278 that the assembly of a branched SCAR and Arp2/3 dependent actin network negatively  
279 regulates the assembly of cortical Myosin, to promote rapid apical Myosin clearance  
280 at the onset of anaphase.

281

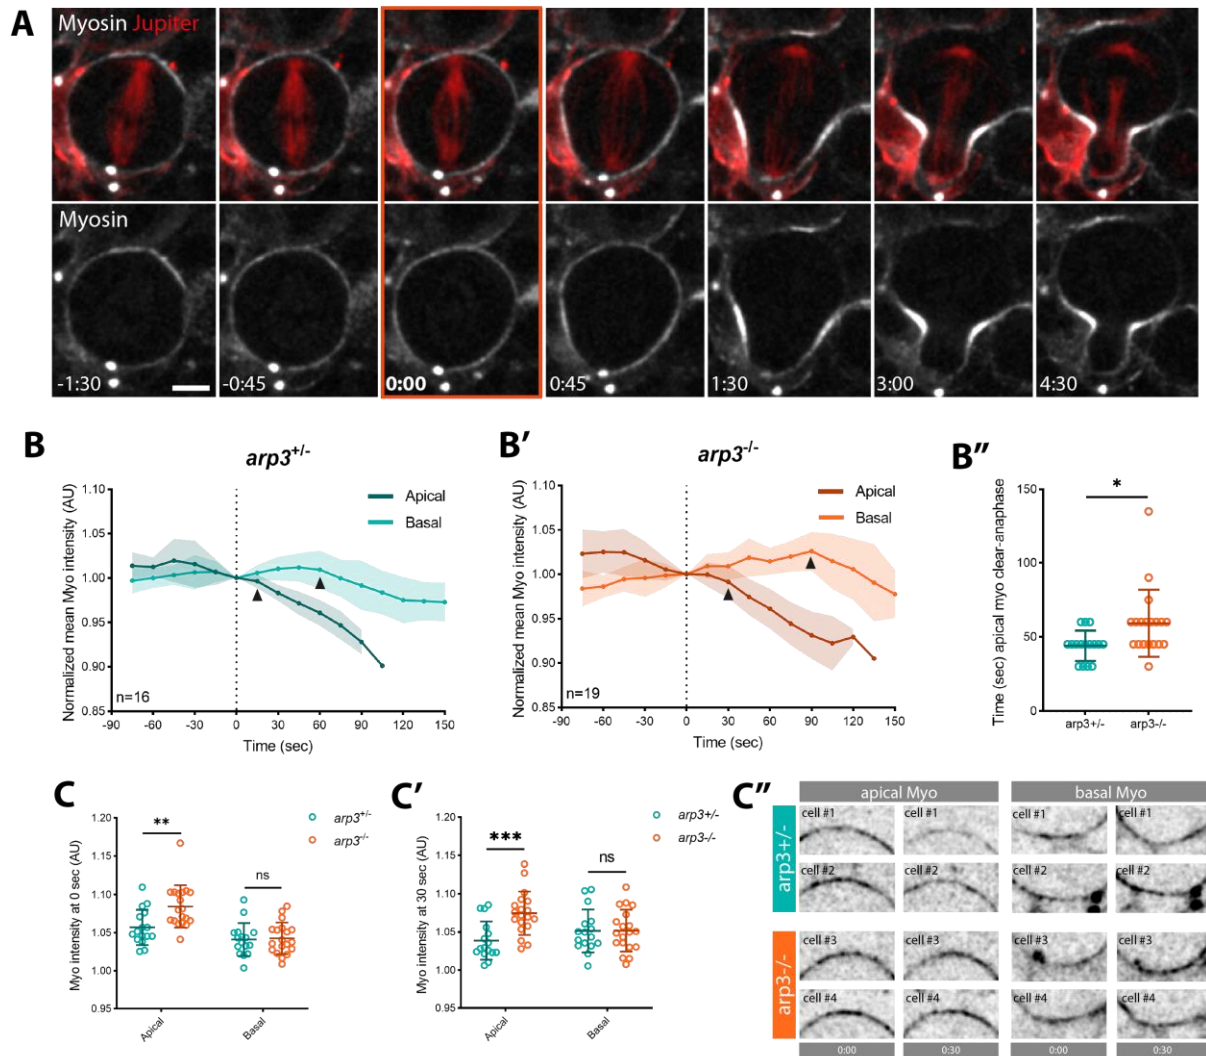

282

283 **Figure 4. Arp2/3 modulates apical Myosin dynamics in mitotic neuroblasts.** **A.** Super-resolution  
 284 time-lapse image of dividing neuroblast expressing non-muscle Myosin II marker (Sqh::GFP) and  
 285 microtubule marker (UAS-cherry::Jupiter). **B-B'.** Graphs showing Myosin intensity changes during  
 286 metaphase-anaphase transition in heterozygous *arp3<sup>+/-</sup>* (*arp3<sup>EP3640</sup>/TM6B*) (**B**) and mutant *arp3<sup>-/-</sup>*  
 287 (*arp3<sup>EP3640</sup>/Deficiency*) (**B'**) expressing Sqh::GFP and UAS-cherry::Jupiter. Arrowheads mark the start  
 288 of Myosin clearance. Myosin intensity was normalized by subtracting the background and centred at  
 289 time 0. **B''.** Plot showing time of apical Myosin clearance relative to anaphase onset (t-test). **C-C'.**  
 290 Myosin intensity at time 0 (**C**) and 30 seconds (**C'**) at the apical and basal sides, compared between  
 291 *arp3<sup>+/-</sup>* and *arp3<sup>-/-</sup>* (2-way ANOVA). Myosin intensity was normalized by subtracting background. **C''.**  
 292 Examples of apical and basal cortex with Myosin signal at time 0 and 30 seconds after anaphase onset  
 293 for *arp3<sup>+/-</sup>* and *arp3<sup>-/-</sup>*. Asterisks denote statistical significance. ns, not significant  $P > 0.05$ , \* $P \leq 0.05$ ,  
 294 \*\* $P \leq 0.01$ , \*\*\* $P \leq 0.001$ . Data are included in Figure 3 – source data 2. Scale bar: 5  $\mu$ m. Central and  
 295 error bars: mean and SD.  
 296

297 To determine the effect of SCAR/Arp2/3 activity on the neuroblast division more  
298 generally and to understand how these subtle but significant changes in cortical  
299 remodeling impact later stages of mitosis, we imaged a large number of neuroblasts  
300 expressing Myosin marker *Sqh::GFP* and the microtubule marker *UAS-cherry::Jupiter*  
301 (Figure 5A). To perturb Arp2/3 activity, we then used Arp2/3 inhibitor CK-666 and  
302 genetic tools (mutation and RNAi-mediated silencing of *arp3* (Figure 5A'-B', 5D, and  
303 Supplemental Figure S5A). While similar phenotypes were observed in all cases, the  
304 strongest was observed following the chemical inhibition of Arp2/3. In CK-666 treated  
305 cells, but not control cells, Myosin was observed ectopically accumulating at the cortex  
306 after the completion of cytokinesis, leading to an aberrant late constriction of the  
307 plasma membrane, which generated a large rounded protrusion (Figure 5A',  
308 arrowheads and 5D). However, the necks of these protrusions were never seen  
309 closing. A milder version this phenotype was observed in cells homozygous for *arp3*  
310 mutations and in *arp3* RNAi cells, where the accumulation of ectopic Myosin was  
311 accompanied by a range of cortical defects (Figure 5B-B', 5D, and Supplemental  
312 Figure S5A). Finally, we tested whether or not similar defects were in somatic *scar*  
313 mutant clones in the larval brain and in cells in which *scar* was knocked-down with  
314 RNAi (Figure 5C-C', 5D and Supplemental Figure S5B). These cells depleted for  
315 SCAR activity exhibited ectopic Myosin localization and cortical defects after the  
316 completion of cytokinesis similar to those observed following perturbation of the Arp2/3  
317 complex (Figure 5C' arrowheads and Supplemental Figure S5B arrowheads). The cell  
318 contour overlays on the side of the montages show how the membrane changes over  
319 time in cells with conditions compared to controls (Figure 5A-C'). These experiments  
320 confirm a role for the SCAR and Arp2/3 complexes in regulating proper asymmetric  
321 neuroblast division, and show that dysregulation of one of these proteins leads to a  
322 various range of defects from metaphase until the end of cytokinesis.

323

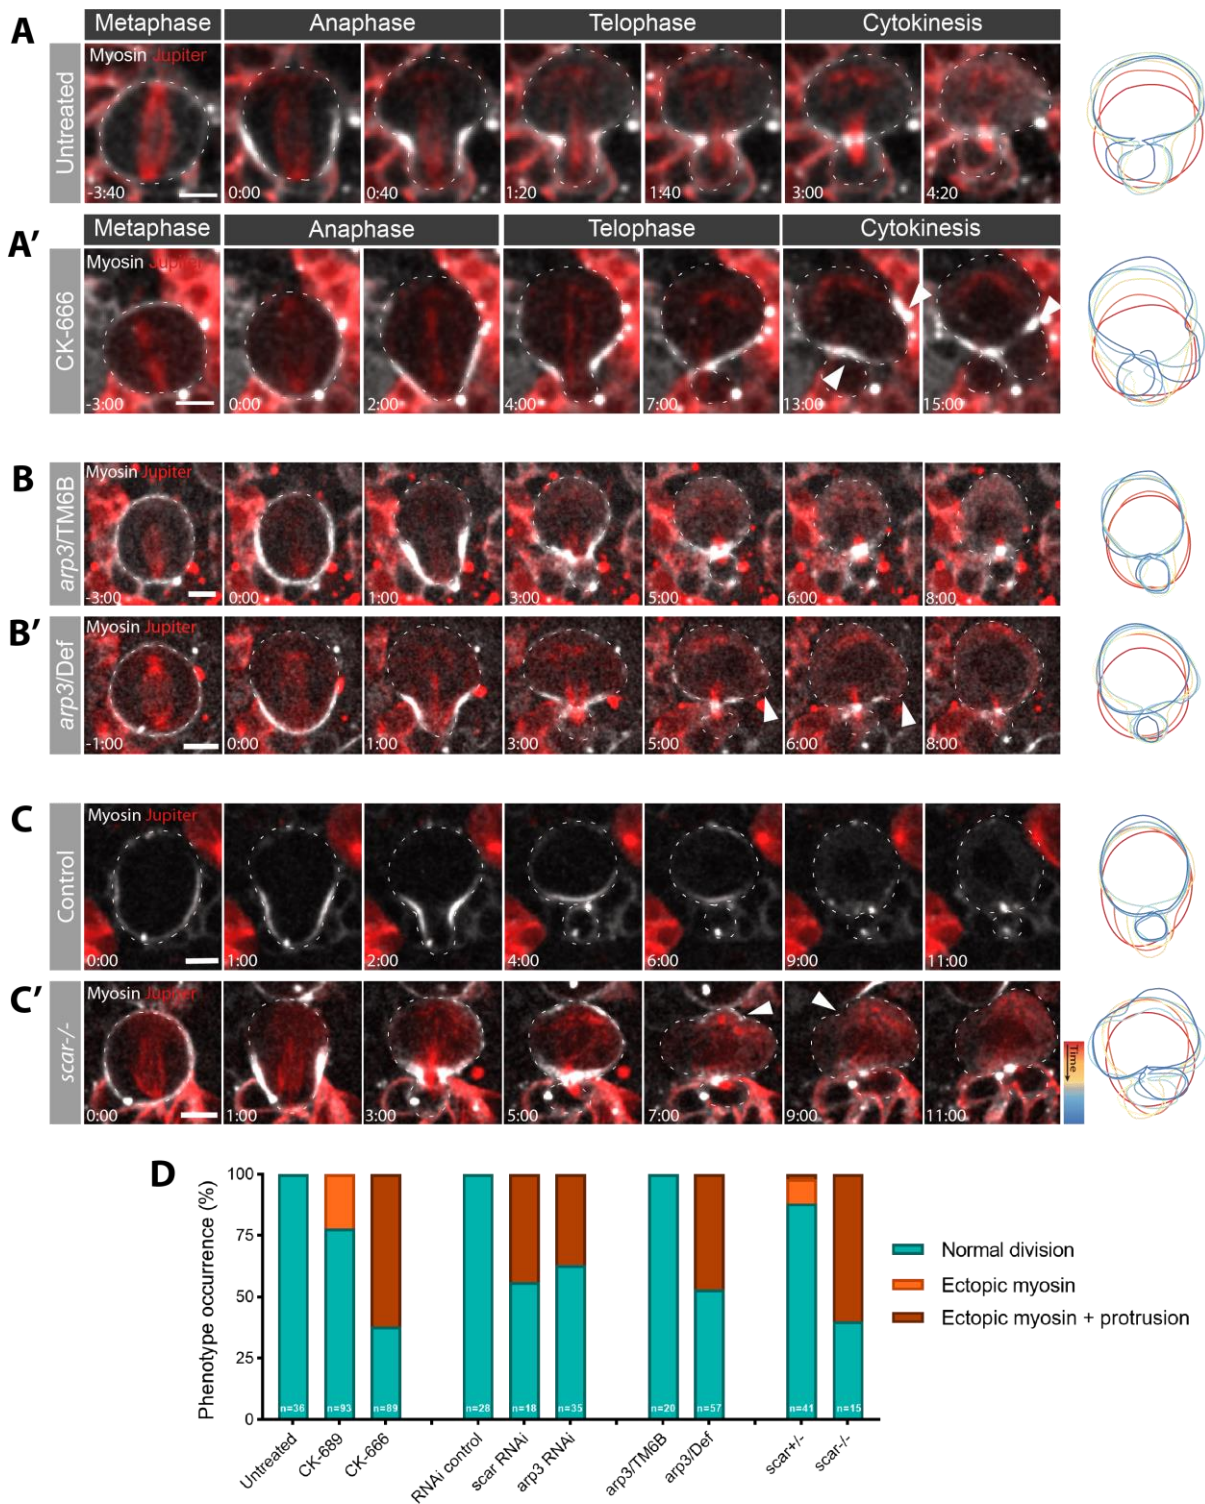

324

325 **Figure 5. SCAR or Arp2/3 inhibition in the dividing neuroblast leads to cortical instability after**  
 326 **cytokinesis. A-C'.** Time-lapse images of dividing neuroblasts expressing a non-muscle Myosin II  
 327 reporter Sqh:GFP and a microtubule marker UAS-cherry::Jupiter. Examples of untreated (A) and CK-  
 328 666 treated (A') neuroblasts. Mutant *arp3* (*arp3/Deficiency*) (B') and control (B, heterozygous  
 329 *arp3/TM6B*). Neuroblast in *scar* mutant clone (C', *scar<sup>-/-</sup>*) and control cell (C). Arrowheads point to  
 330 cortical defects and membrane protrusions due to Arp2/3 or SCAR inhibition. Cell contours on the right  
 331 show for each condition how cell shape changes from anaphase to cytokinesis. Contours are color-  
 332 coded by time. D. Graph showing percentages of cells affected by specific phenotype in each set of  
 333 conditions. Scale bar: 5  $\mu$ m.

334

## 335 Discussion

336 In this study we present a novel role for SCAR and the Arp2/3 complex in regulating  
337 membrane organization and cell shape changes in metaphase-anaphase transition in  
338 neural stem cells in the fly. Thanks to high-resolution spinning-disk microscopy we  
339 were able to image the asymmetric accumulation of filopodia-like membrane  
340 protrusions rich in SCAR, actin and PIP<sub>2</sub> lipids at the apical cortex of these cells in  
341 metaphase (Figure 1). Although Arp2/3 and SCAR are usually associated with the  
342 formation of lamellipodia, this is not unexpected, since in flies these proteins have  
343 been shown to generate filopodial-like cell extensions from an underlying branched  
344 actin network in cells in culture and *in vivo* (Biyasheva et al., 2004; Georgiou & Baum,  
345 2010).

346 While the Arp2/3 complex is responsible for protrusion formation, we still observed  
347 an accumulation of excess apical membrane in patches following perturbations in  
348 Arp2/3 complex activity (Figure 3). This suggests that although the Arp2/3 complex  
349 nucleates a branched-actin network which might create the scaffold for membrane  
350 protrusion formation, it is not necessary for apical membrane accumulation (although  
351 the Latrunculin experiment suggests that actin filaments may play a role in this  
352 process).

353 The apical, actin-rich membrane protrusions formed as cells enter mitosis were  
354 quickly absorbed as cells underwent cortical expansion as they entered anaphase  
355 (Figure 1). While this might lead to the suggestion that protrusions provide a pool of  
356 excess membrane to facilitate cortical expansion, inhibiting the Arp2/3 complex and  
357 protrusion formation did not block the accumulation of an apical pool of membrane rich  
358 in PIP<sub>2</sub> and did not prevent the cell from completing division (Figure 5; Supplemental  
359 Figure S3). Thus, the protrusions themselves do not appear to act as a functionally  
360 important membrane reservoir.

361 On the other hand, the lack of Arp2/3 activity does alter the dynamics of cortical  
362 expansion, cortical stability, and leads to aberrant changes in the shape of cells  
363 undergoing cytokinesis (Figure 3 and Figure 5). These data point to a role for the  
364 complex in polarising the cortex to regulate relaxation of the apical pole and the  
365 dynamics of shape changes that follow. In this process, the SCAR complex would

366 provide a cue to bias the accumulation of Arp2/3 leading to the formation of a branched  
367 apical actin network.

368 The inhibition of Arp2/3 complex activity also leads to an increase of apical Myosin  
369 at the onset of anaphase, without affecting the basal Myosin pool, and leads to a delay  
370 in the clearance of apical Myosin relative to the onset of anaphase (Figure 4).  
371 Interestingly, in *Drosophila* salivary glands, where the actomyosin cortex is used to  
372 collapse large spherical secretory vesicles, the Arp2/3 complex has been proposed to  
373 form stripes of branched actin that help to break the symmetry of the Formin-nucleated  
374 actomyosin cortex around the vesicle to facilitate the collapse (Rouso et al., 2016).  
375 We propose that SCAR and Arp2/3 complexes act in a similar way to pattern the  
376 actomyosin cortex of mitotic neuroblasts to facilitate asymmetric division. In this case,  
377 an apical Arp2/3 dependent actin network may limit the apical accumulation of Myosin  
378 (Muresan et al., 2022; Truong Quang et al., 2021) to facilitate rapid apical cortical  
379 expansion at the onset of anaphase. While it is not clear precisely how these early  
380 changes in cortical remodelling dynamics affect cytokinesis, it is possible that defects  
381 early on in the process lead to stronger phenotypes at later stages of division.  
382 Nevertheless, it remains possible that the loss of branched actin from the apical cortex  
383 has other effects on the system that alter cortical instability at later stages in other  
384 ways.

385

386 Our data suggest that SCAR functions as the main Arp2/3 activator in the  
387 generation of apical membrane protrusions in this system, since reduction in SCAR  
388 (using mutants and RNAi) leads to the same class of phenotypes as those observed  
389 following reduction in Arp2/3 activity (drugs, mutants and RNAi) (Figure 5). While this  
390 is the case, the membrane constriction phenotype observed at cytokinesis is stronger  
391 and more consistent in CK-666 treated cells than it is following perturbations of SCAR  
392 function. Since flies possess additional NPFs, it is also possible that WASH and WASp  
393 play minor roles as Arp2/3 activators in this system. This is because, while there is  
394 often a clear separation between Arp2/3 nucleation promoting factors, with SCAR  
395 being responsible for lamellipodia formation, WASp being involved in filopodia, and  
396 WASH being involved in trafficking, this is not always the case (Campellone & Welch,  
397 2010; Chesarone & Goode, 2009). If they have partially redundant roles, this may  
398 explain why the Arp2/3 phenotypes tend to be stronger than those seen following  
399 reductions in SCAR levels.



400 At the same time, the SCAR depletion appears clear and fits that described by  
401 previous studies that implicated SCAR in the formation of thin actin-based protrusions  
402 (Georgiou & Baum, 2010; Trylinski & Schweisguth, 2019; Zallen et al., 2002).  
403 Moreover, SCAR appears to be in the right place at the right time to generate apically  
404 polarised Arp2/3 dependent protrusions. While it is not clear from our work how SCAR  
405 is localised, its polarized localization resembles that of aPKC and Par3 (Loyer &  
406 Januschke, 2020; Petronczki & Knoblich, 2000; Wodarz et al., 2000). In both  
407 *Drosophila* neuroblasts and *C. elegans* a link between these proteins and F-actin,  
408 Myosin and membrane domains has been clearly established (LaFoya & Prehoda,  
409 2021; Oon & Prehoda, 2021; Scholze et al., 2018). Future work will be necessary to  
410 elucidate whether SCAR is recruited by the polarity pathway and the mechanisms  
411 involved. In general, however, our data shows how the polarised localisation of SCAR  
412 locally activates Arp2/3 to break the symmetry of the cortical actomyosin network in  
413 metaphase. At the onset of anaphase, the presence of this apical branched actin  
414 network may then help to tune the actomyosin cortex to enable the precise control of  
415 changes in cell shape and membrane organisation required for asymmetric cell  
416 division.  
417

## 418 **Methods**

419 **Fly strains and genetics.** Mutant chromosomes were balanced over Cyo::ActGFP  
420 or TM6B, Tb. The following mutant alleles and RNAi lines were used: Arp3<sup>EP3640</sup>  
421 (BL17149, Bloogminton) (Rørth, 1996), Df(3L)Exel6112 (removes Arp3, BL7591,  
422 Bloogminton), SCAR<sup>Δ37</sup> FRT40A (BL8754, Bloomington) (Zallen et al., 2002), SCAR  
423 RNAi (BL36121, Bloomington).

424 **Transgenes and fluorescent markers.** Sqh::GFP (Royou et al., 2002), and UAS-  
425 cherry::Jupiter (Cabernard & Doe, 2009) from C. Roubinet. UAS-PLCΔPH::GFP  
426 (BL39693, Bloomington), UAS-PH::mCherry (BL51658, Bloomington), UAS-  
427 LifeAct::GFP (BL58718, Bloomington), UAS-SCAR::GFP (from M. González-Gaitán).  
428 Transgenes were expressed using the neuroblast-specific driver *worniu-Gal4*  
429 (Albertson & Doe, 2003).

430 **Live imaging sample preparation.** Larvae were dissected to extract the brains in  
431 imaging medium (Schneider's insect medium mixed with 10% FBS (Sigma), 2%  
432 PenStrepNeo (Sigma), 0.02 mg/mL insulin (Sigma), 20mM L-glutamine (Sigma), 0.04  
433 mg/mL L-glutathione reduced (Sigma) and 5 μg/mL 20-hydroxyecdysone (Sigma)).  
434 Brains were then transferred with the medium onto 15μ-slide angiogenesis (Ibidi),  
435 brain lobes facing down, and imaged. When brain dissociation was performed, larvae  
436 were dissected in Chan & Gehring solution 2% FBS (CG-FBS) to extract the brain  
437 (Chan & Gehring, 1971). GC-FBS composes as follow: NaCl 3.2 g/l, KCl 3 g/l, CaCl<sub>2</sub>-  
438 2H<sub>2</sub>O 0.69 g/l, MgSO<sub>4</sub>-7H<sub>2</sub>O 3.7 g/l, Tricine buffer Ph7 1.79 g/l, glucose 3.6 g/l, sucrose  
439 17.1 g/l, BSA 1g/l and FBS 2%. Papain (Sigma, #P4762-50MG, 10 mg/ml) and  
440 collagenase (Sigma, #C2674-1G, 10 mg/ml) were added to the brains in CG-FBS  
441 solutions and they were incubated at 29°C for 45 minutes, to activate the enzymes.  
442 After incubation, brains were washed with imaging medium and finally dissociated  
443 through vigorous pipetting. The brains were then transferred with the medium onto  
444 15μ-slide 8 well (Ibidi) and imaged.

445 **Imaging.** Super-resolution imaging was performed on a CSU-W1 SoRa spinning  
446 disk confocal microscope (Nikon Ti Eclipse 2; Yokogawa CSU-W1 SoRa spinning disk  
447 scan head) with 60×/1.40 N.A oil objective and equipped with a photometrics prime  
448 95B scientific CMOS camera. Whole brain live imaging was performed on a UltraView  
449 Vox spinning disk confocal microscope (Perkin Elmer Nikon TiE; Yokogawa CSU-X1  
450 spinning disc scan head) with 60×/1.40 N.A oil objective and equipped with a  
451 Hamamatsu C9100-13 EMCCD camera. Whole brain imaging has been acquired with  
452 a z-stack spacing of 1 μm, while single cell imaging with a spacing of 0.7 μm. Time  
453 resolution was 60 seconds per frame, unless specified otherwise. Both microscopes  
454 are equipped with a temperature-controlled environment chamber set at 26° C for the  
455 experiments.

456 **Treatments.** For chemical treatments to inhibit the Arp2/3 complex, the inhibitor  
457 CK-666 (Sigma #SML0006, final concentration 400 μM) or the inactive equivalent  
458 compound, CK-689 (Sigma #182517, final concentration 400 μM), were added before

459 live imaging. To induce actin depolymerization, Latrunculin B (Sigma #L5288-1MG) at  
460 a final concentration of 10  $\mu$ M was added to the media.

461 **Image processing.** All image analysis was carried out on unprocessed raw images.  
462 For clarity, images displayed in this work were processed using ImageJ software  
463 (Schindelin et al., 2012). Background was (rolling ball radius 50 pixel) and a Gaussian  
464 Blur applied (radius 1). As stated in Figure legends, images represent a single confocal  
465 z-stack section or a maximum z-projection. In all figures, the time point 0 is anaphase  
466 onset, defined in this work as the first frame where the spindle starts to separate.  
467 Figures were assembled using Adobe Illustrator CS6.

468 **Image analysis.** Experiments in which cortical PH or Myosin intensity were  
469 measured, a line of a specific width and length was drawn on the area of interest and  
470 the mean pixel value was calculated. The data were normalized by subtracting the  
471 background and were centred at the time 0. To calculate the movement of the  
472 membrane during cortical expansion, a maximum projection of 3 z-slices from the  
473 centre of cells dividing along the axis parallel to the field of view was generated. A line  
474 was drawn from the centre of the spindle to the apical membrane, starting two time-  
475 frames before anaphase onset. A kymograph was generated from this line, the  
476 movement of the membrane was traced and the set of coordinates were used to  
477 generate the curves in the graphs. Coordinates were centred to start at (x=0, y=0). To  
478 plot the mean, the curves were interpolated in Excel using linear interpolation. The  
479 mean curves were fitted with a sigmoid curve in Prism. The slopes were calculated by  
480 fitting each curve with a sigmoid in Prism, the slopes of curves for control and treated  
481 cells were then compared with a t-test.

482 **Statistical analysis.** For experiments with quantification, the data was collected  
483 from at least 2 independent experiments, and, for each independent experiment, at  
484 least 2 brain lobes were imaged. For the analysis, “n” refers to the number of cells  
485 analysed and is represented on the graph or mentioned in figure legends. Statistical  
486 significance was determined with Student’s t test where two groups were compared  
487 and 2-way ANOVA where more than two groups were compared, using GraphPad  
488 Prism 9 software. In all figures the Prism convention is used: ns ( $P > 0.05$ ), \* ( $P \leq 0.05$ ),  
489 \*\* ( $P \leq 0.01$ ), \*\*\* ( $P \leq 0.001$ ) and \*\*\*\* ( $P \leq 0.0001$ ). In all graphs showing mean, the error  
490 bars correspond to standard deviation (SD).

491

492 **Funding:** G.C. was supported by MRC (1621658). C.R. and B.B. were supported by  
493 a Cancer Research UK program grant (C1529/A17343). We thank the MRC LMB for  
494 their generous support.

495 **Author contributions:** B.B. and G.C. conceived the study with input from C.R. Initial  
496 observations on cortical defects at cytokinesis after CK-666 treatment were made by  
497 C.R. G.C performed experiments and analysis. B.B and G.C. wrote the manuscript.  
498 C.R. provided advice.

499 **Acknowledgments:** We thank Emmanuel Derivery and Guillaume Charras for  
500 reading the manuscript and providing comments.

501 **Competing interests:** Authors declare that they have no competing interests.

502

## 503 Bibliography

- 504 Albertson, R., & Doe, C. Q. (2003). Dlg, Scrib and Lgl regulate neuroblast cell size and  
505 mitotic spindle asymmetry. *Nature Cell Biology*, 5(2), 166–170.  
506 <https://doi.org/10.1038/ncb922>
- 507 Bello, B. C., Izergina, N., Caussinus, E., & Reichert, H. (2008). Amplification of neural  
508 stem cell proliferation by intermediate progenitor cells in Drosophila brain  
509 development. *Neural Development*, 3(1), 1–18. [https://doi.org/10.1186/1749-](https://doi.org/10.1186/1749-8104-3-5/FIGURES/8)  
510 [8104-3-5/FIGURES/8](https://doi.org/10.1186/1749-8104-3-5/FIGURES/8)
- 511 Biyasheva, A., Svitkina, T., Kunda, P., Baum, B., & Borisy, G. (2004). Cascade  
512 pathway of filopodia formation downstream of SCAR. *Journal of Cell Science*,  
513 117(6), 837–848. <https://doi.org/10.1242/JCS.00921>
- 514 Boone, J. Q., & Doe, C. Q. (2008). Identification of Drosophila type II neuroblast  
515 lineages containing transit amplifying ganglion mother cells. *Developmental*  
516 *Neurobiology*, 68(9), 1185–1195. <https://doi.org/10.1002/DNEU.20648>
- 517 Bovellan, M., Romeo, Y., Biro, M., Boden, A., Chugh, P., Yonis, A., Vaghela, M.,  
518 Fritzsche, M., Moulding, D., Thorogate, R., Jégou, A., Thrasher, A. J., Romet-  
519 Lemonne, G., Roux, P. P., Paluch, E. K., & Charras, G. (2014). Cellular control of  
520 cortical actin nucleation. *Current Biology*, 24(14), 1628–1635.  
521 <https://doi.org/10.1016/j.cub.2014.05.069>
- 522 Cabernard, C., & Doe, C. Q. (2009). Apical/Basal Spindle Orientation Is Required for  
523 Neuroblast Homeostasis and Neuronal Differentiation in Drosophila.  
524 *Developmental Cell*, 17(1), 134–141.  
525 <https://doi.org/10.1016/j.devcel.2009.06.009>
- 526 Cabernard, C., Prehoda, K. E., & Doe, C. Q. (2010). A spindle-independent cleavage  
527 furrow positioning pathway. *Nature*, 467(7311), 91–94.  
528 <https://doi.org/10.1038/nature09334>
- 529 Campellone, K. G., & Welch, M. D. (2010). A nucleator arms race: cellular control of  
530 actin assembly. *Nature Reviews Molecular Cell Biology*, 11(4), 237–251.  
531 <https://doi.org/10.1038/nrm2867>
- 532 Cao, L., Yonis, A., Vaghela, M., Barriga, E. H., Chugh, P., Smith, M. B., Maufroid, J.,  
533 Lavoie, G., Méant, A., Ferber, E., Bovellan, M., Alberts, A., Bertin, A., Mayor, R.,  
534 Paluch, E. K., Roux, P. P., Jégou, A., Romet-Lemonne, G., & Charras, G. (2020).

- 535 SPIN90 associates with mDia1 and the Arp2/3 complex to regulate cortical actin  
536 organization. *Nature Cell Biology* 2020 22:7, 22(7), 803–814.  
537 <https://doi.org/10.1038/s41556-020-0531-y>
- 538 Chan, L. N., & Gehring, W. (1971). Determination of Blastoderm Cells in *Drosophila*  
539 *melanogaster*. *Proceedings of the National Academy of Sciences*, 68(9), 2217–  
540 2221. <https://doi.org/10.1073/PNAS.68.9.2217>
- 541 Chesarone, M. A., & Goode, B. L. (2009). Actin nucleation and elongation factors:  
542 mechanisms and interplay. *Current Opinion in Cell Biology*, 21(1), 28–37.  
543 <https://doi.org/10.1016/j.ceb.2008.12.001>
- 544 Connell, M., Cabernard, C., Ricketson, D., Doe, C. Q., & Prehoda, K. E. (2011).  
545 Asymmetric cortical extension shifts cleavage furrow position in *Drosophila*  
546 neuroblasts. *Molecular Biology of the Cell*, 22(22), 4220–4226.  
547 <https://doi.org/10.1091/mbc.E11-02-0173>
- 548 D'Avino, P. P., Giansanti, M. G., & Petronczki, M. (2015). Cytokinesis in animal cells.  
549 *Cold Spring Harbor Perspectives in Biology*, 7(4), 1–17.  
550 <https://doi.org/10.1101/cshperspect.a015834>
- 551 Derivery, E., Sousa, C., Gautier, J. J., Lombard, B., Loew, D., & Gautreau, A. (2009).  
552 The Arp2/3 Activator WASH Controls the Fission of Endosomes through a Large  
553 Multiprotein Complex. *Developmental Cell*, 17(5), 712–723.  
554 <https://doi.org/10.1016/j.devcel.2009.09.010>
- 555 Farina, F., Ramkumar, N., Brown, L., Samandar Eweis, D., Anstatt, J., Waring, T.,  
556 Bithell, J., Scita, G. G., Thery, M., Blanchoin, L., Zech, T., Baum, B., Samander-,  
557 D., Anstatt, J., Waring, T., Bithell, J., Scita, G. G., Blanchoin, L., Zech, T., ...  
558 Baum, B. (2019). Local actin nucleation tunes centrosomal microtubule nucleation  
559 during passage through mitosis. *The EMBO Journal*, 38(11), 1–16.  
560 <https://doi.org/10.15252/emboj.201899843>
- 561 Fink, J., Carpi, N., Betz, T., Bétard, A., Chebah, M., Azioune, A., Bornens, M., Sykes,  
562 C., Fetler, L., Cuvelier, D., & Piel, M. (2011). External forces control mitotic spindle  
563 positioning. *Nature Cell Biology*, 13(7), 771–778.  
564 <https://doi.org/10.1038/NCB2269>
- 565 Georgiou, M., & Baum, B. (2010). Polarity proteins and Rho GTPases cooperate to  
566 spatially organise epithelial actin-based protrusions. *Journal of Cell Science*,  
567 123(7), 1089–1098. <https://doi.org/10.1242/jcs.060772>

- 568 Hannaford, M. R., Ramat, A., Loyer, N., & Januschke, J. (2018). aPKC-mediated  
569 displacement and actomyosin-mediated retention polarize Miranda in *Drosophila*  
570 neuroblasts. *ELife*, 7. <https://doi.org/10.7554/eLife.29939>
- 571 Herszterg, S., Leibfried, A., Bosveld, F., Martin, C., & Bellaiche, Y. (2013). Interplay  
572 between the Dividing Cell and Its Neighbors Regulates Adherens Junction  
573 Formation during Cytokinesis in Epithelial Tissue. *DEVCEL*, 24(3), 256–270.  
574 <https://doi.org/10.1016/j.devcel.2012.11.019>
- 575 Kiyomitsu, T., & Cheeseman, I. M. (2012). Chromosome- and spindle-pole-derived  
576 signals generate an intrinsic code for spindle position and orientation. *Nature Cell*  
577 *Biology* 2012 14:3, 14(3), 311–317. <https://doi.org/10.1038/ncb2440>
- 578 Kunda, P., Craig, G., Dominguez, V., & Baum, B. (2003). Abi, Sra1, and Kette Control  
579 the Stability and Localization of SCAR/WAVE to Regulate the Formation of Actin-  
580 Based Protrusions. *Current Biology*, 13(21), 1867–1875.  
581 <https://doi.org/10.1016/j.cub.2003.10.005>
- 582 LaFoya, B., & Prehoda, K. E. (2021). Actin-dependent membrane polarization reveals  
583 the mechanical nature of the neuroblast polarity cycle. *Cell Reports*, 35(7),  
584 109146. <https://doi.org/10.1016/j.celrep.2021.109146>
- 585 Loyer, N., & Januschke, J. (2020). Where does asymmetry come from? Illustrating  
586 principles of polarity and asymmetry establishment in *Drosophila* neuroblasts. In  
587 *Current Opinion in Cell Biology* (Vol. 62, pp. 70–77). Elsevier Ltd.  
588 <https://doi.org/10.1016/j.ceb.2019.07.018>
- 589 Matthews, H. K., Delabre, U., Rohn, J. L., Guck, J., Kunda, P., & Baum, B. (2012).  
590 Changes in Ect2 Localization Couple Actomyosin-Dependent Cell Shape  
591 Changes to Mitotic Progression. *Developmental Cell*, 23(2), 371–383.  
592 <https://doi.org/10.1016/j.devcel.2012.06.003>
- 593 Mitsushima, M., Aoki, K., Ebisuya, M., Matsumura, S., Yamamoto, T., Matsuda, M.,  
594 Toyoshima, F., & Nishida, E. (2010). Revolving movement of a dynamic cluster  
595 of actin filaments during mitosis. *Journal of Cell Biology*, 191(3), 453–462.  
596 <https://doi.org/10.1083/jcb.201007136>
- 597 Morton, W. M., Ayscough, K. R., & Mclaughlin, P. J. (2000). Latrunculin alters the  
598 actin-monomer subunit interface to prevent polymerization. *Nature Cell Biology*  
599 2000 2:6, 2(6), 376–378. <https://doi.org/10.1038/35014075>
- 600 Moulding, D. A., Moeendarbary, E., Valon, L., Record, J., Charras, G. T., & Thrasher,  
601 A. J. (2012). Excess F-actin mechanically impedes mitosis leading to cytokinesis

- 602 failure in X-linked neutropenia by exceeding Aurora B kinase error correction  
603 capacity. *Blood*, 120(18), 3803–3811. [https://doi.org/10.1182/blood-2012-03-](https://doi.org/10.1182/blood-2012-03-419663)  
604 419663
- 605 Muresan, C. G., Sun, Z. G., Yadav, V., Tabatabai, A. P., Lanier, L., Kim, J. H., Kim,  
606 T., & Murrell, M. P. (2022). F-actin architecture determines constraints on myosin  
607 thick filament motion. *Nature Communications* 2022 13:1, 13(1), 1–16.  
608 <https://doi.org/10.1038/s41467-022-34715-6>
- 609 Oon, C. H., & Prehoda, K. E. (2019). Asymmetric recruitment and actin- dependent  
610 cortical flows drive the neuroblast polarity cycle. *ELife*, 8, 1–15.  
611 <https://doi.org/10.7554/eLife.45815>
- 612 Oon, C. H., & Prehoda, K. E. (2021). Phases of cortical actomyosin dynamics coupled  
613 to the neuroblast polarity cycle. *ELife*, 10. <https://doi.org/10.7554/eLife.66574>
- 614 Petronczki, M., & Knoblich, J. A. (2000). DmPAR-6 directs epithelial polarity and  
615 asymmetric cell division of neuroblasts in *Drosophila*. *Nature Cell Biology* 2001  
616 3:1, 3(1), 43–49. <https://doi.org/10.1038/35050550>
- 617 Plessner, M., Knerr, J., & Grosse, R. (2019). Centrosomal Actin Assembly Is Required  
618 for Proper Mitotic Spindle Formation and Chromosome Congression. *IScience*,  
619 15, 274–281. <https://doi.org/10.1016/j.isci.2019.04.022>
- 620 Pollard, T. D. (2007). Regulation of actin filament assembly by Arp2/3 complex and  
621 formins. *Annual Review of Biophysics and Biomolecular Structure*, 36, 451–477.  
622 <https://doi.org/10.1146/annurev.biophys.35.040405.101936>
- 623 Rajan, A., Tien, A. C., Haueter, C. M., Schulze, K. L., & Bellen, H. J. (2009). The  
624 Arp2/3 complex and WASp are required for apical trafficking of Delta into microvilli  
625 during cell fate specification of sensory organ precursors. *Nature Cell Biology*,  
626 11(7), 815–824. <https://doi.org/10.1038/ncb1888>
- 627 Ramkumar, N., & Baum, B. (2016). Coupling changes in cell shape to chromosome  
628 segregation. *Nature Reviews Molecular Cell Biology*, 17(8), 511–521.  
629 <https://doi.org/10.1038/nrm.2016.75>
- 630 Rodrigues, N. T. L., Lekomtsev, S., Jananji, S., Kriston-Vizi, J., Hickson, G. R. X., &  
631 Baum, B. (2015). Kinetochores localize PP1-Sds22 couples chromosome  
632 segregation to polar relaxation. *Nature*, 524(7566), 489–492.  
633 <https://doi.org/10.1038/nature14496>
- 634 Rørth, P. (1996). A modular misexpression screen in *Drosophila* detecting tissue-  
635 specific phenotypes. *Proceedings of the National Academy of Sciences of the*



- 636 *United States of America*, 93(22), 12418–12422.  
637 <https://doi.org/10.1073/PNAS.93.22.12418>
- 638 Rosa, A., Vlassaks, E., Pichaud, F., Baum, B., Vlassaks, E., Pichaud, F., Baum, B.,  
639 Rosa, A., Vlassaks, E., Pichaud, F., Baum, B., Vlassaks, E., Pichaud, F., & Baum,  
640 B. (2015). Ect2/Pbl Acts via Rho and Polarity Proteins to Direct the Assembly of  
641 an Isotropic Actomyosin Cortex upon Mitotic Entry. *Developmental Cell*, 32(5),  
642 604–616. <https://doi.org/10.1016/j.devcel.2015.01.012>
- 643 Rotty, J. D., Wu, C., & Bear, J. E. (2013). New insights into the regulation and cellular  
644 functions of the ARP2/3 complex. *Nature Reviews Molecular Cell Biology*, 14(1),  
645 7–12. <https://doi.org/10.1038/nrm3492>
- 646 Roubinet, C., Tsankova, A., Pham, T. T., Monnard, A., Caussinus, E., Affolter, M., &  
647 Cabernard, C. (2017). Spatio-temporally separated cortical flows and spindle  
648 geometry establish physical asymmetry in fly neural stem cells. *Nature*  
649 *Communications*, 1–15. <https://doi.org/10.1038/s41467-017-01391-w>
- 650 Rousso, T., Schejter, E. D., & Shilo, B. Z. (2016). Orchestrated content release from  
651 Drosophila glue-protein vesicles by a contractile actomyosin network. *Nature Cell*  
652 *Biology*, 18(2), 181–190. <https://doi.org/10.1038/ncb3288>
- 653 Royou, A., Sullivan, W., & Karess, R. (2002). Cortical recruitment of nonmuscle  
654 myosin II in early syncytial Drosophila embryos: its role in nuclear axial expansion  
655 and its regulation by Cdc2 activity. *The Journal of Cell Biology*, 158(1), 127–137.  
656 <https://doi.org/10.1083/jcb.200203148>
- 657 Schindelin, J., Arganda-Carreras, I., Frise, E., Kaynig, V., Longair, M., Pietzsch, T.,  
658 Preibisch, S., Rueden, C., Saalfeld, S., Schmid, B., Tinevez, J. Y., White, D. J.,  
659 Hartenstein, V., Eliceiri, K., Tomancak, P., & Cardona, A. (2012). Fiji: an open-  
660 source platform for biological-image analysis. *Nature Methods* 2012 9:7, 9(7),  
661 676–682. <https://doi.org/10.1038/nmeth.2019>
- 662 Scholze, M. J., Barbieux, K. S., de Simone, A., Boumasmoud, M., Süess, C. C. N.,  
663 Wang, R., & Gönczy, P. (2018). PI(4,5)P2 forms dynamic cortical structures and  
664 directs actin distribution as well as polarity in caenorhabditis elegans embryos.  
665 *Development (Cambridge)*, 145(11), 169144. <https://doi.org/10.1242/dev.164988>
- 666 Stevens, J. M., Galyov, E. E., & Stevens, M. P. (2006). Actin-dependent movement of  
667 bacterial pathogens. *Nature Reviews Microbiology* 2006 4:2, 4(2), 91–101.  
668 <https://doi.org/10.1038/nrmicro1320>

- 669 Truong Quang, B. A., Peters, R., Cassani, D. A. D., Chugh, P., Clark, A. G., Agnew,  
670 M., Charras, G., & Paluch, E. K. (2021). Extent of myosin penetration within the  
671 actin cortex regulates cell surface mechanics. *Nature Communications* 2021 12:1,  
672 12(1), 1–12. <https://doi.org/10.1038/s41467-021-26611-2>
- 673 Trylinski, M., Mazouni, K., & Schweisguth, F. (2017). Intra-lineage Fate Decisions  
674 Involve Activation of Notch Receptors Basal to the Midbody in *Drosophila* Sensory  
675 Organ Precursor Cells. *Current Biology*, 27(15), 2239-2247.e3.  
676 <https://doi.org/10.1016/j.cub.2017.06.030>
- 677 Trylinski, M., & Schweisguth, F. (2019). Activation of Arp2/3 by WASp Is Essential for  
678 the Endocytosis of Delta Only during Cytokinesis in *Drosophila*. *Cell Reports*,  
679 28(1), 1-10.e3. <https://doi.org/10.1016/j.celrep.2019.06.012>
- 680 Wodarz, A., Ramrath, A., Grimm, A., & Knust, E. (2000). *Drosophila* Atypical Protein  
681 Kinase C Associates with Bazooka and Controls Polarity of Epithelia and  
682 Neuroblasts. *Journal of Cell Biology*, 150(6), 1361–1374.  
683 <https://doi.org/10.1083/JCB.150.6.1361>
- 684 Zallen, J. A., Cohen, Y., Hudson, A. M., Cooley, L., Wieschaus, E., & Schejter, E. D.  
685 (2002). SCAR is a primary regulator of Arp2/3-dependent morphological events  
686 in *Drosophila*. *Journal of Cell Biology*, 156(4), 689–701.  
687 <https://doi.org/10.1083/jcb.200109057>
- 688
- 689

## 690 Supplementary figures

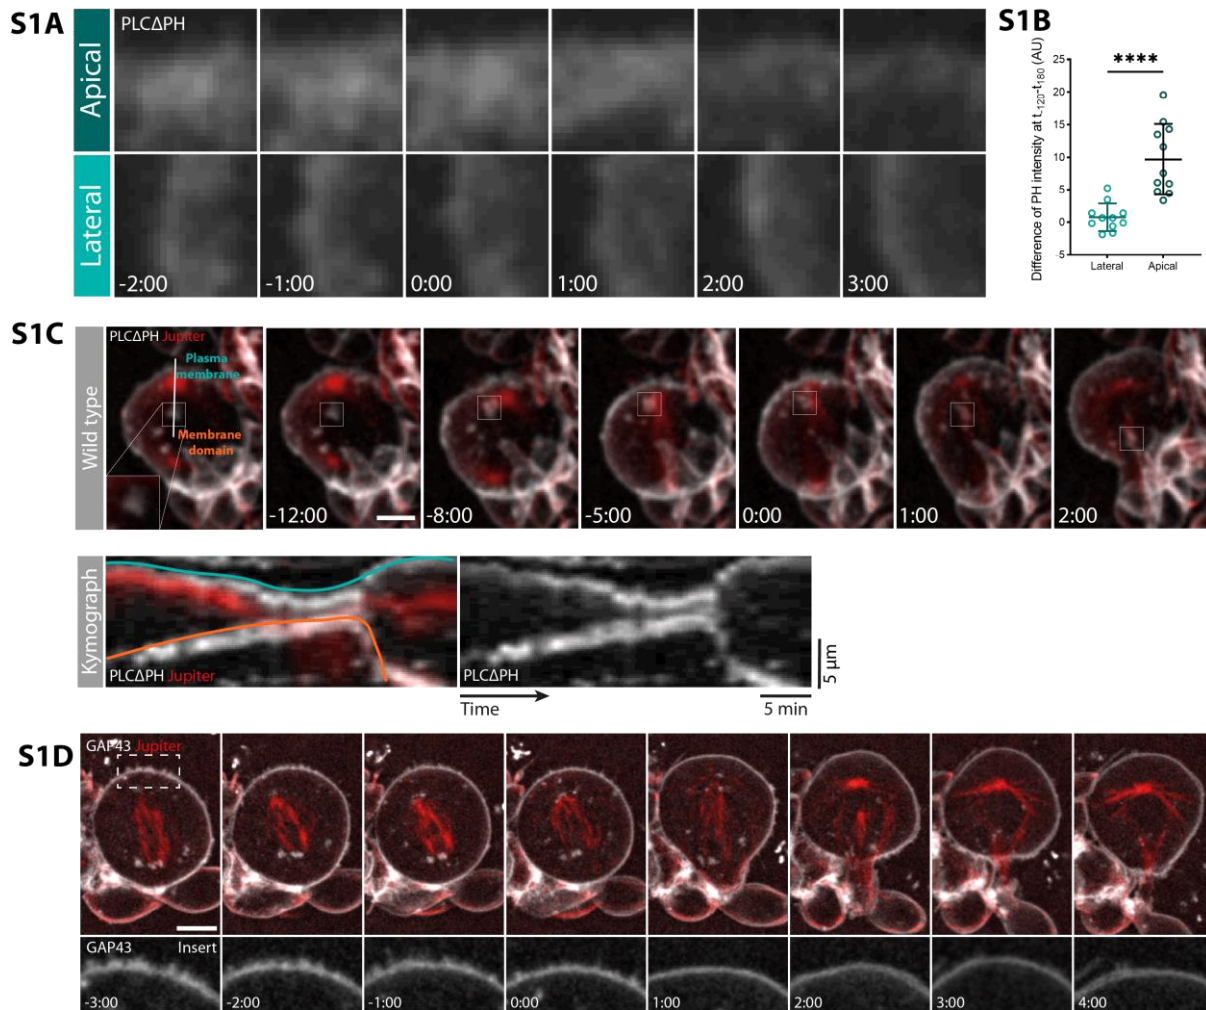

691

692

693 **Supplemental Figure S1. In dividing neuroblasts apical plasma membrane undergoes**

694 **remodelling dependent on the cell cycle. A.** Zoom of apical and lateral membrane from wild-type

695 neuroblast expressing UAS-PLCΔPH::GFP. **B.** Plot showing difference of PH intensity between t-

696 120sec and t180sec in both lateral and apical membrane domains. Asterisk (\*\*\*\*) denote statistical

697 significance.  $P \leq 0.0001$  (paired t-test). **C.** Maximum intensity z-projection of dividing neuroblast

698 expressing membrane marker, UAS-PLCΔPH::GFP and a microtubule marker UAS-cherry::Jupiter,

699 both expressed via wor-GAL4/UAS. The white line indicates the position used to generate the

700 kymograph. Insert shows an example of a membrane domain. Kymograph shows the movement of the

701 plasma membrane (blue) and of a more basal PH::GFP-rich membrane domain (orange).

702 **D.** High resolution imaging of neuroblast expressing membrane marker, mCherry::GAP43, driven by sqh

703 promoter. Insert shows membrane protrusions at the apical side of the cell in metaphase (-3:00 to -

704 1:00). Apical protrusions begin to disappear as cells enter anaphase.

705 Scale bar: 5 μm. Central and error bars: mean and SD.

706

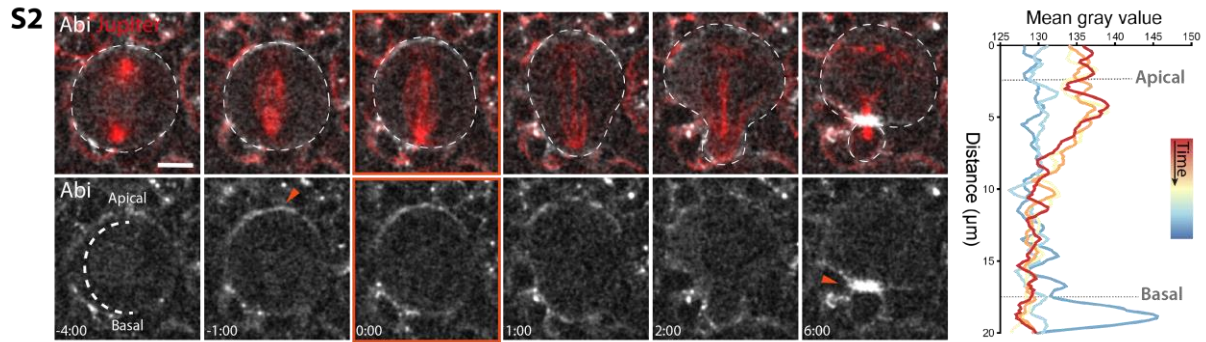

707

708 **Supplemental Figure S2. A second component of the SCAR complex, Abi, localizes at the apical**  
 709 **side of the neuroblast at metaphase and the furrow at cytokinesis.** Super-resolution images of  
 710 neuroblast expressing ubi-mCherry::Abi. Arrowheads point to Abi localization at the apical cortex in  
 711 metaphase and at the furrow at cytokinesis. Mean Abi signal intensity was acquired by drawing a line  
 712 from apical to basal side of the cortex, like depicted at time -4:00, and was plotted in graphs on the  
 713 right.

714 Scale bar: 5  $\mu\text{m}$ .

715

716

717

718

719

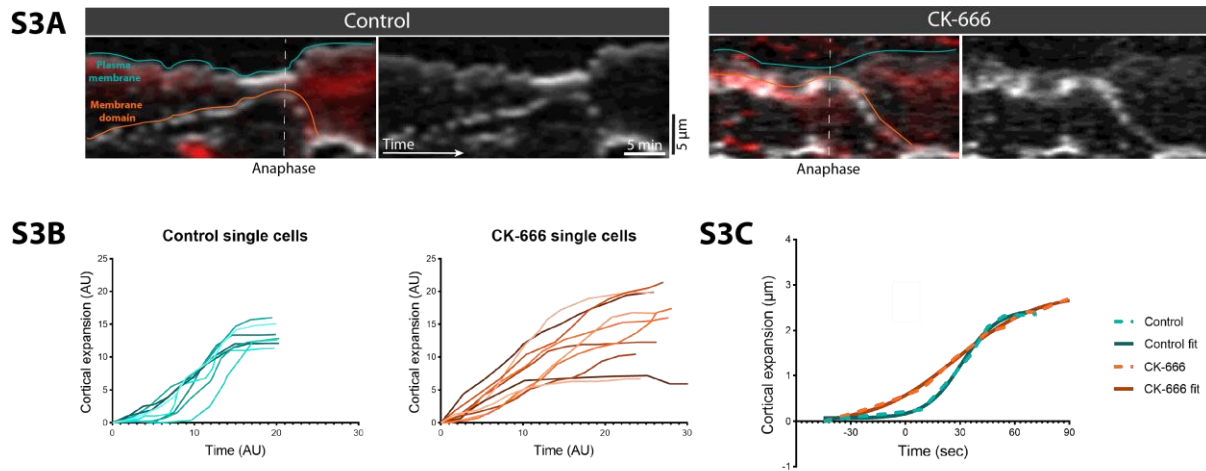

720

721 **Supplemental Figure S3. Arp2/3 inhibition does not abolish the movement of membrane**  
 722 **domains during neuroblasts cell division.** **A.** Kymographs of control (CK-689 treatment) and CK-  
 723 666 treated cells, expressing PH::GFP and cherry::Jupiter, and showing movement of plasma  
 724 membrane (blue lines) and membrane domain (orange lines) starting from prophase to cytokinesis. **B.**  
 725 Single cell tracks of cortical expansion during anaphase in control (CK-689) and CK-666 treated cells.  
 726 **C.** Graph showing mean of cortical expansion and sigmoid curves fitted on top of control and treatment  
 727 curves.

728

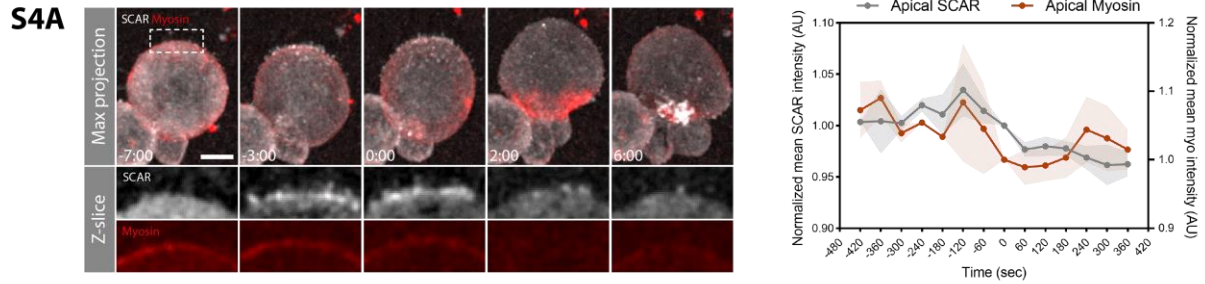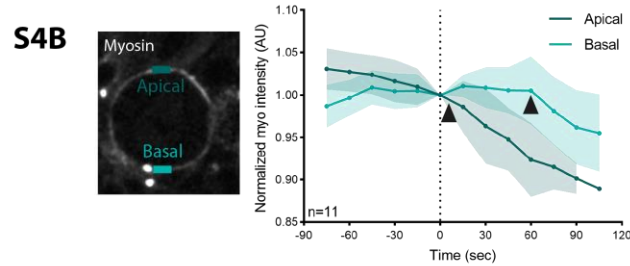

729

730 **Supplemental Figure S4. Apical Myosin and SCAR undergo parallel changes in their localisation**  
 731 **at the metaphase-anaphase transition. A.** Super-resolution imaging of dissociated neuroblast  
 732 expressing SCAR reporter, UAS-SCAR::GFP and a non-muscle Myosin II marker, UAS-Sqh::cherry,  
 733 which expressions is driven by wor-GAL4. Inserts show apical SCAR and Myosin signals. Graph on the  
 734 right shows SCAR and Myosin apical intensities during neuroblast division. **B.** Graph shows apical and  
 735 basal Myosin intensity changes with time, measured from cells expressing Myosin marker Sqh::GFP.  
 736 Apical and basal rectangles in the cell indicate the areas measured for the graph. Arrowheads mark  
 737 time points at which Myosin starts to be cleared.

738 Scale bar: 5  $\mu$ m. Central and error bars: mean and SD.

739

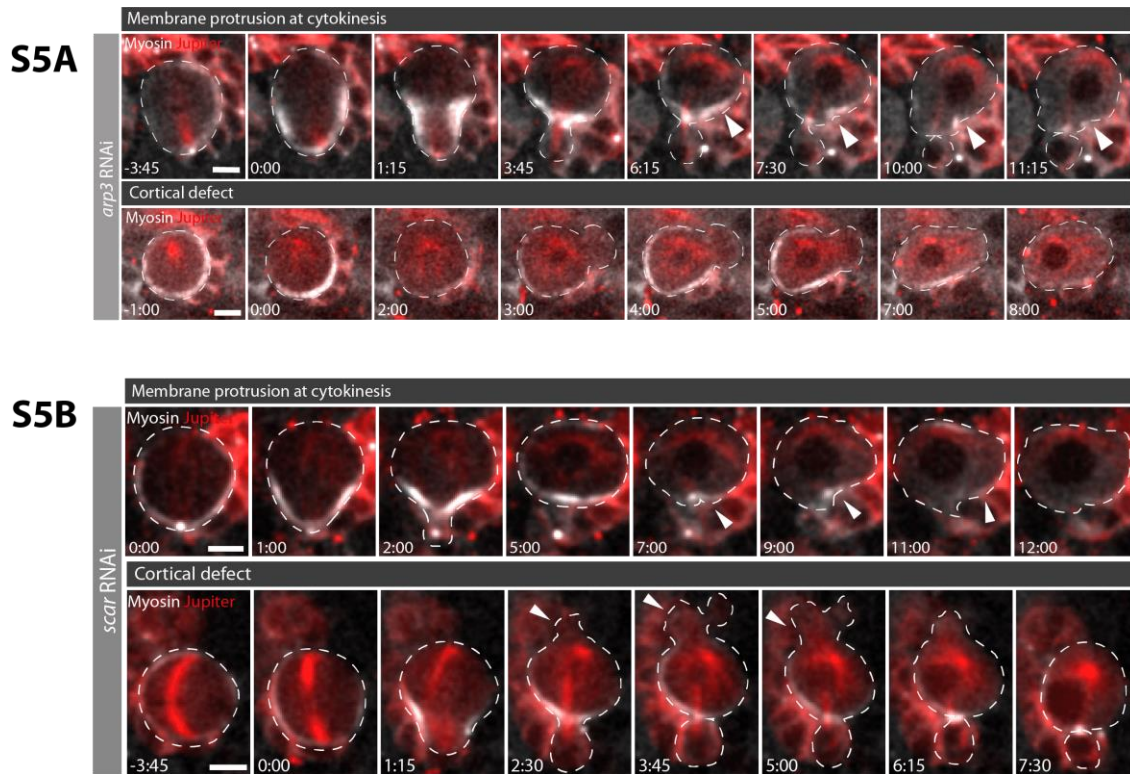

740

741

742

743

744

745

746

747

748

**Supplemental Figure S5. Knock-down of arp3 and scar by RNAi lead to cortical defects and membrane instability at cytokinesis.** Time-lapse image of representative neuroblasts expressing Myosin marker Sqh::GFP and microtubule marker cherry::Jupiter. Panels on top show example of membrane protrusion phenotype at cytokinesis. Panels on the bottom show example of cortical defects like blebbing. **A.** Cells expressing dsRNA for arp3 subunit of the Arp2/3 complex. **B.** Cells expressing dsRNA for scar.

Scale bar: 5  $\mu$ m.
